# Supplementary material for: Lagrangian formation pathways of moist anomalies in the trade-wind region during the dry season: two case studies from EUREC 4 A
Source: Copernicus journal article supplement (doi:10.5194/wcd-3-59-2022), 2022-01-18
Supplement: Supplementary file 1 [file wcd-3-59-2022-supplement.zip]

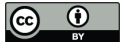

## *Supplement of*

# **Lagrangian formation pathways of moist anomalies in the trade-wind region during the dry season: two case studies from EUREC<sup>4</sup>A**

**Leonie Villiger et al.**

*Correspondence to:* Leonie Villiger ([leonie.villiger@env.ethz.ch](mailto:leonie.villiger@env.ethz.ch))

- [wcd-3-59-2022-supplement-title-page.pdf](#)
- [Supplement1.pdf](#)
- [Supplement2.pdf](#)
- [Supplement3\\_trajectories\\_1000-650hPa\\_2020-01-22.mp4](#)
- [Supplement4\\_trajectories\\_650-300hPa\\_2020-02-14.mp4](#)

The copyright of individual parts of the supplement might differ from the article licence.
