# Supplementary material for: Lagrangian formation pathways of moist anomalies in the trade-wind region during the dry season: two case studies from EUREC 4 A
Source: Copernicus journal article supplement (doi:10.5194/wcd-3-59-2022), 2022-01-18
Supplement: Supplementary file 3 [file wcd-3-59-2022-supplement.zip]

Archive with 5 entries (5 files):
- Supplement4_trajectories_650-300hPa_2020-02-14.mp4
- Supplement3_trajectories_1000-650hPa_2020-01-22.mp4
- Supplement1.pdf
- wcd-3-59-2022-supplement-title-page.pdf
- Supplement2.pdf
